# Supplementary material for: Clinical significance of intronic variants in BRAF inhibitor resistant melanomas with altered BRAF transcript splicing
Source: PubMed Central journal article supplement (PMC5426037; doi:10.1186/s40364-017-0098-3), 2017-05-11
Supplement: 40364_2017_98_MOESM3_ESM.pdf [file 40364_2017_98_MOESM3_ESM.pdf]

**Table S1. Amplification and Sequencing Primers**

|                      | <b>Forward</b>         | <b>Reverse</b>         |
|----------------------|------------------------|------------------------|
| <b>Exon3/Intron3</b> | TATGAAGAATACACCAGCAA   | CAAGTTTGGCAGACAGGTTT   |
| <b>Intron3/Exon4</b> | TGTGATTGAAGGGTTATACAG  | ATCCTGAATTCTGTAAACA    |
| <b>Intron8/exon9</b> | GGAAGCCATTGGTTTTGAAT   | CTGTGTCTGTTACTTGAAAG   |
| <b>Intron1/Exon2</b> | AGTATTTAATTATATGTGTACA | TCCAGATATATTGATGGTGGAT |
| <b>Exon1/Intron1</b> | GGCTCTCGGTTATAAGATGGC  | GCTCAACCACCGCTGCCCAAT  |
| <b>BRAF cDNA</b>     | GGCTCTCGGTTATAAGATGGC  | ACAGGAAACGCACCATATCC   |
